# Supplementary material
Source: Springer Nature journal article supplement (https://www.springermedizin.de/resource/supplementary/12887_2009_331_MOESM2_ESM.pdf/9474850)
Supplement: MOESM2 [file 9474850]

791 women who participated in the first follow up study were mailed a survey

491 completed and returned the questionnaire  
(62% participation)

300 did not return the questionnaire

- 11 refused to take the survey
- 4 were ineligible (2 out of country, 2 had second child in the survey)
- 227 did not return the questionnaire
- 58 not contactable by phone
